# Supplementary material for: All-solid-state asymmetric supercapacitor based on reduced graphene oxide/carbon nanotube and carbon fiber paper/polypyrrole electrodes
Source: Royal Society of Chemistry journal article supplement (doi:10.1039/c3ta13953k), 2013-11-07
Supplement: c3ta13953k.pdf [file c3ta13953k.pdf]

**Electronic Supplementary Information for**  
**All-solid-state asymmetric supercapacitor based on reduced**  
**graphene oxide/carbon nanotube and carbon fiber**  
**paper/polypyrrole electrodes**

Chongyang Yang, Jiali Shen, Chunyan Wang, Haojie Fei, Hua Bao and Gengchao Wang\*

Shanghai Key Laboratory of Advanced Polymeric Materials, Key Laboratory for  
Ultrafine Materials of Ministry of Education, School of Materials Science and Engineering,  
East China University of Science and Technology, Shanghai 200237, P.R.China

\*Email: gengchaow@ecust.edu.cn

## **Experimental section**

### **Methylene blue technique for specific surface area measurement**

Methylene blue (MB) is a common dye probe used to evaluate the specific surface area (SSA). The specific surface area was measured using MB adsorption method by UV-vis spectroscopy.<sup>1-4</sup> The test was taken by first adding a known mass of sample into a known volume MB solution of standard concentration. The mixed suspension was then sonicated for 2 h and stirred continuously for 24 h to reach the adsorption-desorption equilibrium of MB. The mixture was further centrifuged to remove any suspended material. The MB concentration was subsequently determined by analyzing the supernatant through UV-vis spectroscopy at a wavelength of 665 nm compared with the initial standard concentration. The value of specific surface area can be calculated from the amount of adsorbed MB according to the following equation:

$$SSA = \frac{N_A A_{MB} (C_0 - C_e) V}{M_{MB} m_S}$$

where  $N_A$  is Avogadro number ( $6.02 \times 10^{23}/\text{mol}$ ),  $A_{MB}$  is the covered area of per MB molecule (typically assumed to be  $1.35 \text{ nm}^2$ ),  $C_0$  and  $C_e$  are the initial and equilibrium concentrations of MB, respectively,  $V$  is the volume of MB solution,  $M_{MB}$  is the relative molecular mass of MB, and  $m_S$  is the mass of the sample.

## Results and discussion

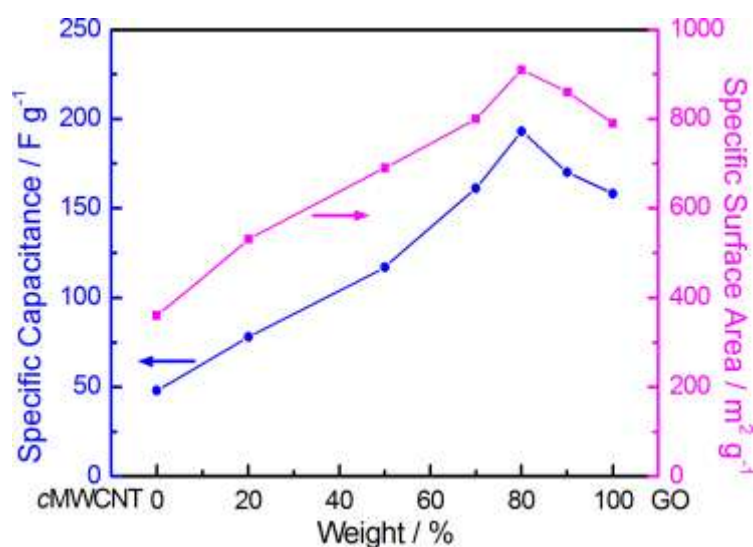

**Fig. S1** Influence of GO/cMWCNT weight ratio on the specific capacitance and the specific surface area of RGO/cMWCNT.

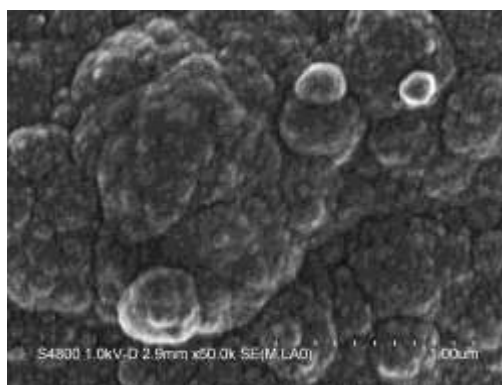

**Fig. S2** FE-SEM image of CFP/PPy-1200s film with high magnification.

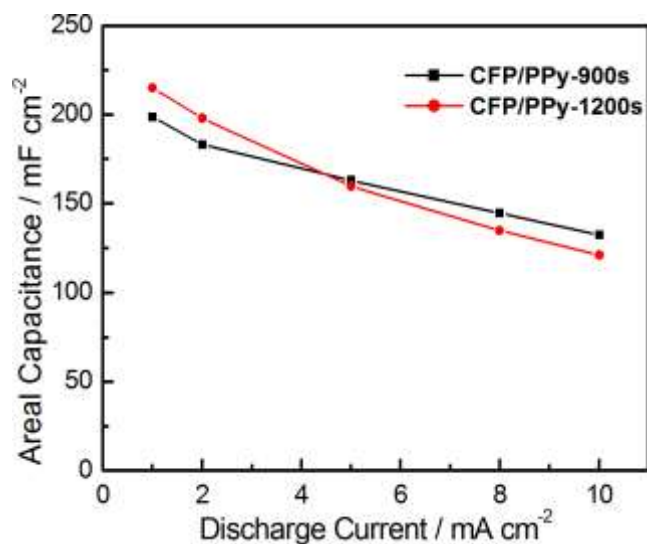

**Fig. S3** Specific capacitance of CFP/PPy-900s and CFP/PPy-1200s as a function of current densities.

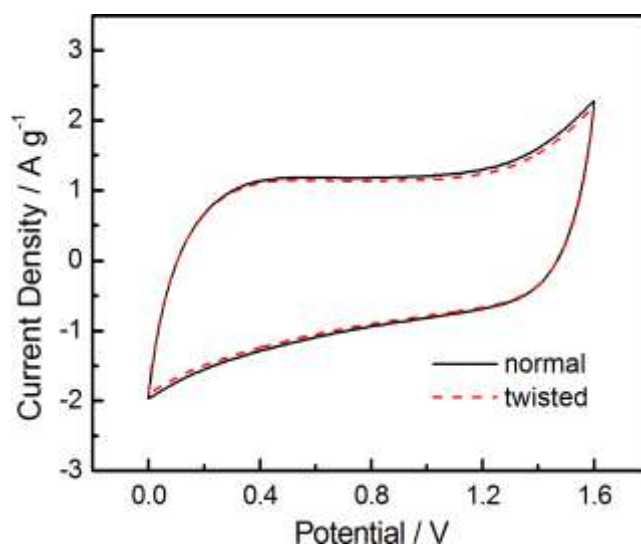

**Fig. S4** Cyclic voltammetry curves of CFP/PPy//RGO/cMWCNT ASC at normal and twisted states.

## References

- S1 M. F. El-Kady, V. Strong, S. Dubin and R. B. Kaner, *Science*, 2012, **335**, 1326-1330.
- S2 M. J. McAllister, J. L. Li, D. H. Adamson, H. C. Schniepp, A. A. Abdala, J. Liu, M. Herrera-Alonso, D. L. Milius, R. Car, R. K. Prud'homme and I. A. Aksay, *Chem. Mater.*, 2007, **19**, 4396-4404.

S3 Y. Yukselen and A. Kaya, *Eng. Geol.*, 2008, **102**, 38-45.

S4 A. Chowdhury, F. S. Saleh, M. R. Rahman and A. Rahim, *J. Appl. Polym. Sci.*, 2008, **109**,  
1764-1771.
